# Supplementary material
Source: PubMed Central journal article supplement (PMC5012470)
Supplement: CJN.00490116SupplementaryData.pdf [file CJN.00490116SupplementaryData.pdf]

## Supplemental Figure: Study questionnaire

How would you describe your race?

- Caucasian or White
- African American or Black
- Chinese
- Filipino
- Asian Indian
- Native Hawaiian or other Pacific islander
- Other Asian
- Other \_\_\_\_\_

How would you describe your ethnicity?

- Not of Hispanic or Latino origin
- Mexican, Mexican American, or Chicano
- Other Hispanic or Latino origin

What is your country of birth?

\_\_\_\_\_

What is the highest grade or year of school you have completed?

- Primary school (finished around age 12)
- Secondary school (finished around age 18)
- Some college
- Finished college
- Attended and/or finished graduate school

What language do you primarily speak at home?

- English
- Spanish
- Cantonese
- Mandarin
- Tagalog
- Russian
- Other \_\_\_\_\_

In which language do you communicate with your doctor?

- English
- Spanish
- Cantonese
- Mandarin
- Tagalog
- Russian
- Other \_\_\_\_\_

How well do you speak English?

- Not at all
- Not well
- Well
- Very well

Have you ever been told by a doctor or health care provider: ... that you have weak or failing kidneys (excluding stones, bladder infections, or incontinence)?\_

- Yes
- No
- Unsure

Have you ever been told by a doctor or other health care provider ... that you have kidney disease?

- Yes
- No
- Unsure

Have you ever been told by a doctor or other health care provider ... that you have high blood pressure?

- Yes
- No
- Unsure

Have you ever been told by a doctor or health care provider that you have protein in the urine?

- Yes
- No
- Unsure

Have you ever been told by a doctor or other health care provider .... that you have diabetes or problems with high blood sugar?

- Yes
- No
- Unsure

Have you ever been told by a doctor or other health care provider.... that you have a kidney problem?

- Yes
- No
- Unsure

Have you ever been told by a doctor or other health care provider .... that you have high cholesterol?

- Yes
- No
- Unsure

Have you ever been told by a doctor or other health care provider.... that your kidneys are damaged?

- Yes
- No
- Unsure

How often do you have someone help you read hospital materials?

- Never
- Occasionally
- Sometimes
- Often
- Always

How confident are you filling out medical forms by yourself?

- Extremely
- Quite a bit
- Somewhat
- A little bit
- Not at all

How often do you have problems learning about your medical condition because of difficulty understanding written information?

- Never
- Occasionally
- Sometimes
- Often
- Always
